# Supplementary material for: A primary undifferentiated pleomorphic sarcoma of the lumbosacral region harboring a LMNA-NTRK1 gene fusion with durable clinical response to crizotinib: a case report
Source: PubMed Central journal article supplement (PMC6106902; doi:10.1186/s12885-018-4749-z), 2018-08-22
Supplement: 12885_2018_4749_MOESM1_ESM.pdf [file 12885_2018_4749_MOESM1_ESM.pdf]

Formalin-fixed paraffin-embedded sections stained with MDM2/CEP12 FISH Probe.

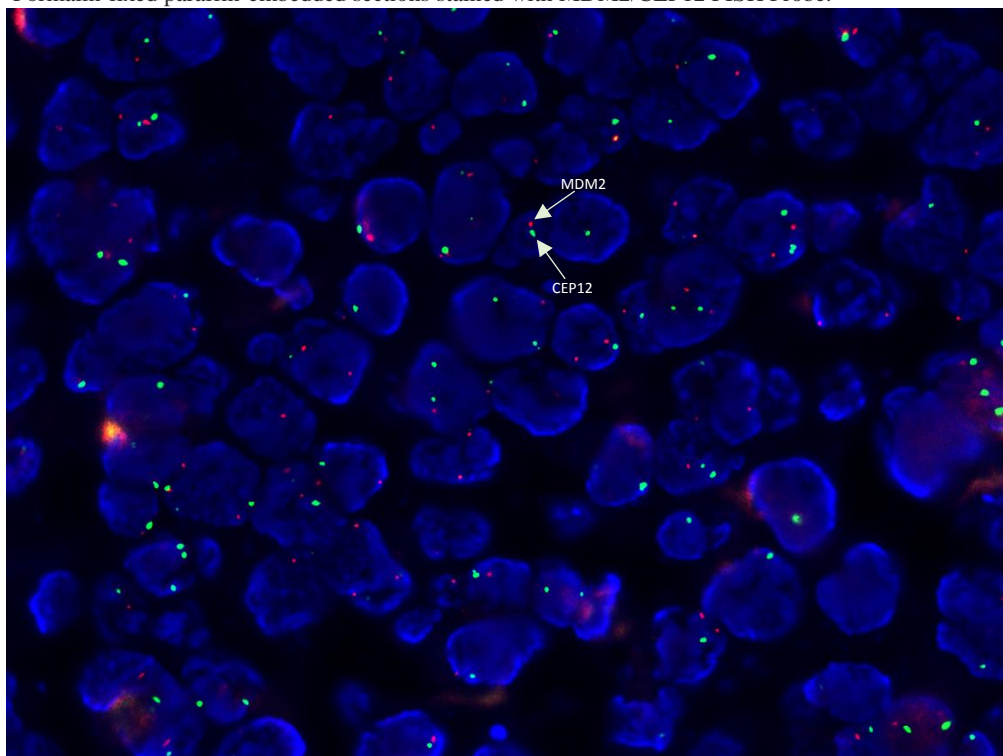

| signal number of MDM2 and CEP12 in 100 interphase cells |         |      |        |        |         |      |        |
|---------------------------------------------------------|---------|------|--------|--------|---------|------|--------|
| Image#                                                  | Cell ID | MDM2 | CEP-12 | Image# | Cell ID | MDM2 | CEP-12 |
| 16-17098C2                                              |         | 3    | 3      |        |         | 3    | 3      |
|                                                         |         | 3    | 2      |        |         | 3    | 2      |
|                                                         |         | 3    | 3      |        |         | 2    | 2      |
|                                                         |         | 3    | 1      |        |         | 3    | 3      |
|                                                         |         | 4    | 2      |        |         | 4    | 3      |
|                                                         |         | 2    | 3      |        |         | 5    | 2      |
|                                                         |         | 1    | 1      |        |         | 2    | 1      |
|                                                         |         | 2    | 3      |        |         | 3    | 3      |
|                                                         |         | 2    | 2      |        |         | 2    | 2      |
|                                                         |         | 3    | 3      |        |         | 2    | 2      |
|                                                         |         | 4    | 3      |        |         | 2    | 2      |
|                                                         |         | 3    | 3      |        |         | 3    | 3      |
|                                                         |         | 2    | 1      |        |         | 3    | 3      |
|                                                         |         | 3    | 3      |        |         | 3    | 2      |
|                                                         |         | 3    | 2      |        |         | 5    | 3      |
|                                                         |         | 3    | 1      |        |         | 4    | 3      |
|                                                         |         | 2    | 2      |        |         | 2    | 2      |
|                                                         |         | 2    | 1      |        |         | 2    | 2      |
|                                                         |         | 2    | 1      |        |         | 2    | 1      |
|                                                         |         | 3    | 3      |        |         | 3    | 2      |

|                               |                                                              |             |   |                                 |  |      |   |
|-------------------------------|--------------------------------------------------------------|-------------|---|---------------------------------|--|------|---|
|                               |                                                              | 5           | 3 |                                 |  | 3    | 3 |
|                               |                                                              | 5           | 2 |                                 |  | 3    | 3 |
|                               |                                                              | 2           | 1 |                                 |  | 5    | 3 |
|                               |                                                              | 3           | 1 |                                 |  | 3    | 2 |
|                               |                                                              | 4           | 2 |                                 |  | 2    | 2 |
|                               |                                                              | 3           | 2 |                                 |  | 2    | 2 |
|                               |                                                              | 2           | 3 |                                 |  | 4    | 3 |
|                               |                                                              | 3           | 2 |                                 |  | 2    | 2 |
|                               |                                                              | 3           | 1 |                                 |  | 2    | 1 |
|                               |                                                              | 3           | 3 |                                 |  | 2    | 2 |
|                               |                                                              | 3           | 2 |                                 |  | 3    | 3 |
|                               |                                                              | 3           | 1 |                                 |  | 3    | 2 |
|                               |                                                              | 2           | 1 |                                 |  | 3    | 3 |
|                               |                                                              | 2           | 2 |                                 |  | 5    | 4 |
|                               |                                                              | 2           | 1 |                                 |  | 4    | 3 |
|                               |                                                              | 4           | 2 |                                 |  | 4    | 2 |
|                               |                                                              | 1           | 2 |                                 |  | 2    | 2 |
|                               |                                                              | 3           | 2 |                                 |  | 3    | 1 |
|                               |                                                              | 1           | 1 |                                 |  | 3    | 3 |
|                               |                                                              | 2           | 2 |                                 |  | 3    | 3 |
|                               |                                                              | 4           | 2 |                                 |  | 2    | 2 |
|                               |                                                              | 1           | 1 |                                 |  | 3    | 3 |
|                               |                                                              | 1           | 1 |                                 |  | 3    | 2 |
|                               |                                                              | 3           | 3 |                                 |  | 3    | 3 |
|                               |                                                              | 3           | 3 |                                 |  | 4    | 3 |
|                               |                                                              | 3           | 1 |                                 |  | 5    | 3 |
|                               |                                                              | 3           | 2 |                                 |  | 2    | 2 |
|                               |                                                              | 1           | 1 |                                 |  | 2    | 2 |
|                               |                                                              | 4           | 4 |                                 |  | 3    | 2 |
|                               |                                                              | 3           | 3 |                                 |  | 3    | 1 |
|                               |                                                              |             |   |                                 |  |      |   |
|                               |                                                              |             |   |                                 |  |      |   |
| Total number of MDM2 signals  |                                                              | 284         |   | Average number of MDM2 signals  |  | 2,84 |   |
| Total number of CEP12 signals |                                                              | 218         |   | Average number of CEP12 signals |  | 2,18 |   |
| Total Cell number             |                                                              | 100         |   |                                 |  |      |   |
|                               |                                                              |             |   |                                 |  |      |   |
| <b>result</b>                 | <b>MDM2/CEP12=</b>                                           | <b>1,30</b> |   |                                 |  |      |   |
|                               |                                                              |             |   |                                 |  |      |   |
|                               | <b>MDM2/CEP12 ratio <math>\geq 2.0</math> means positive</b> |             |   |                                 |  |      |   |

Approximately 100 interphase cells were evaluated with each probe set. MDM2/CEP12 ratio  $\geq 2.0$  of tumor nuclei showing amplification was considered positive. In terms of our sample, the ratio was 1.3, that means MDM2 amplification status was negative, lipogenesis histology can be excluded.
