# Supplementary material for: A primary undifferentiated pleomorphic sarcoma of the lumbosacral region harboring a LMNA-NTRK1 gene fusion with durable clinical response to crizotinib: a case report
Source: PubMed Central journal article supplement (PMC6106902; doi:10.1186/s12885-018-4749-z), 2018-08-22
Supplement: 12885_2018_4749_MOESM2_ESM.pdf [file 12885_2018_4749_MOESM2_ESM.pdf]

## The MasterView 381 cancer-gene panel

### 365 cancer-related genes

|        |          |          |        |         |          |         |         |         |         |        |          |        |         |
|--------|----------|----------|--------|---------|----------|---------|---------|---------|---------|--------|----------|--------|---------|
| ABL1   | ABL2     | ACVR1B   | ACVR2A | ADAM29  | AKT1     | AKT2    | AKT3    | ALK     | AMER1   | APC    | AR       | ARAF   | ARFRP1  |
| ARID1A | ARID1B   | ARID2    | ASXL1  | ATM     | ATR      | ATRX    | AURKA   | AURKB   | AXIN1   | AXL    | BAP1     | BARD1  | BCL2    |
| BCL2L1 | BCL2L2   | BCL6     | BCOR   | BCORL1  | BIRC5    | BLK     | BLM     | BMX     | BRAF    | BRCA1  | BRCA2    | BRD4   | BRIP1   |
| BTG1   | BTK      | C11orf30 | CARD11 | CBFB    | CBL      | CCND1   | CCND2   | CCND3   | CCNE1   | CD274  | CD79A    | CD79B  | CDC73   |
| CDH1   | CDK12    | CDK4     | CDK6   | CDK8    | CDKN1A   | CDKN1B  | CDKN2A  | CDKN2B  | CDKN2C  | CEBPA  | CHD2     | CHD4   | CHEK1   |
| CHEK2  | CIC      | CRBN     | CREBBP | CRKL    | CRLF2    | CSF1R   | CSK     | CSNK1A1 | CTCF    | CTNNA1 | CTNNB1   | CUL3   | CXCR4   |
| CYLD   | DAXX     | DDR1     | DDR2   | DICER1  | DNMT3A   | DOT1L   | EGF     | EGFR    | EP300   | EPHA2  | EPHA3    | EPHA5  | EPHA7   |
| EPHB1  | ERBB2    | ERBB3    | ERBB4  | ERCC1   | ERG      | ERRF1   | ESR1    | EZH2    | FAM135B | FAM46C | FANCA    | FANCC  | FANCD2  |
| FANCE  | FANCF    | FANCG    | FANCL  | FAS     | FAT1     | FBXW7   | FGF10   | FGF14   | FGF19   | FGF23  | FGF3     | FGF4   | FGF6    |
| FGFR1  | FGFR2    | FGFR3    | FGFR4  | FGR     | FH       | FLCN    | FLT1    | FLT3    | FLT4    | FOXL2  | FOXP1    | FRS2   | FUBP1   |
| FYN    | GABRA6   | GATA1    | GATA2  | GATA3   | GATA4    | GATA6   | GID4    | GLI1    | GLI2    | GLI3   | GNA11    | GNA13  | GNAQ    |
| GNAS   | GPR124   | GRIN2A   | GRM3   | GSK3B   | H3F3A    | HCK     | HGF     | HNF1A   | HRAS    | HSD3B1 | HSP90AA1 | IDH1   | IDH2    |
| IGF1R  | IGF2     | IKBKE    | IKZF1  | IL7R    | INHBA    | INPP4B  | IRF2    | IRF4    | IRS2    | ITK    | JAK1     | JAK2   | JAK3    |
| JUN    | KAT6A    | KDM5A    | KDM5C  | KDM6A   | KDR      | KEAP1   | KEL     | KIT     | KLHL6   | KMT2A  | KMT2C    | KMT2D  | KRAS    |
| LCK    | LIMK1    | LMO1     | LRP1   | LRP1B   | LYN      | LZTR1   | MAGI2   | MAP2K1  | MAP2K2  | MAP2K4 | MAP3K1   | MAP4K5 | MCL1    |
| MDM2   | MDM4     | MED12    | MEF2B  | MEN1    | MET      | MITF    | MLH1    | MPL     | MRE11A  | MS4A1  | MSH2     | MSH6   | MST1R   |
| MTOR   | MUTYH    | MYC      | MYCL   | MYCN    | MYD88    | NEK11   | NF1     | NF2     | NFE2L2  | NFKBIA | NKX2-1   | NOTCH1 | NOTCH2  |
| NOTCH3 | NPM1     | NRAS     | NRG1   | NRG3    | NSD1     | NTRK1   | NTRK2   | NTRK3   | NUP93   | PAK3   | PALB2    | PARK2  | PAX5    |
| PBRM1  | PDCD1LG2 | PDGFRA   | PDGFRB | PKD1    | PIK3C2B  | PIK3CA  | PIK3CB  | PIK3CD  | PIK3CG  | PIK3R1 | PIK3R2   | PKD2   | PLA2G1B |
| PLCG2  | PMS2     | POLD1    | POLE   | PPP2R1A | PRDM1    | PREX2   | PRKAR1A | PRKCI   | PRKDC   | PRSS8  | PTCH1    | PTEN   | PTK2    |
| PTK6   | PTPN11   | QKI      | RAC1   | RAD50   | RAD51    | RAF1    | RANBP2  | RARA    | RB1     | RBM10  | RET      | RICTOR | RNF43   |
| ROCK1  | ROCK2    | ROS1     | RPTOR  | RUNX1   | RUNX1T1  | RXRA    | SDHA    | SDHB    | SDHC    | SDHD   | SETD2    | SF3B1  | SIK1    |
| SLIT2  | SMAD2    | SMAD3    | SMAD4  | SMARCA4 | SMARCB1  | SMO     | SNAI1   | SOCS1   | SOX10   | SOX2   | SOX9     | SPEN   | SPOP    |
| SPTA1  | SRC      | SRMS     | STAG2  | STAT3   | STAT4    | STK11   | STK24   | SUFU    | SYK     | TAP1   | TBX3     | TCF7L2 | TEK     |
| TET2   | TGFBR1   | TGFBR2   | TIE1   | TNFAIP3 | TNFRSF14 | TNFSF11 | TNK2    | TOP1    | TOP2A   | TP53   | TSC1     | TSC2   | TSHR    |
| TYK2   | U2AF1    | VEGFA    | VHL    | WEE1    | WEE2     | WISP3   | WT1     | XIAP    | XPO1    | YES1   | ZBTB2    | ZNF217 | ZNF703  |
| ZNF750 |          |          |        |         |          |         |         |         |         |        |          |        |         |

### 25 genes frequently rearranged in cancers

|     |     |        |       |       |        |      |      |      |      |      |       |       |       |
|-----|-----|--------|-------|-------|--------|------|------|------|------|------|-------|-------|-------|
| ALK | BCR | BRAF   | BRCA1 | BRCA2 | BRD4   | DDR2 | ETV1 | ETV4 | ETV5 | ETV6 | FGFR1 | FGFR2 | FGFR3 |
| MET | MYB | NOTCH2 | NTRK1 | NTRK2 | PDGFRA | RAF1 | RARA | RET  | ROS1 | TPR2 |       |       |       |
