# Supplementary material for: A primary undifferentiated pleomorphic sarcoma of the lumbosacral region harboring a LMNA-NTRK1 gene fusion with durable clinical response to crizotinib: a case report
Source: PubMed Central journal article supplement (PMC6106902; doi:10.1186/s12885-018-4749-z), 2018-08-22

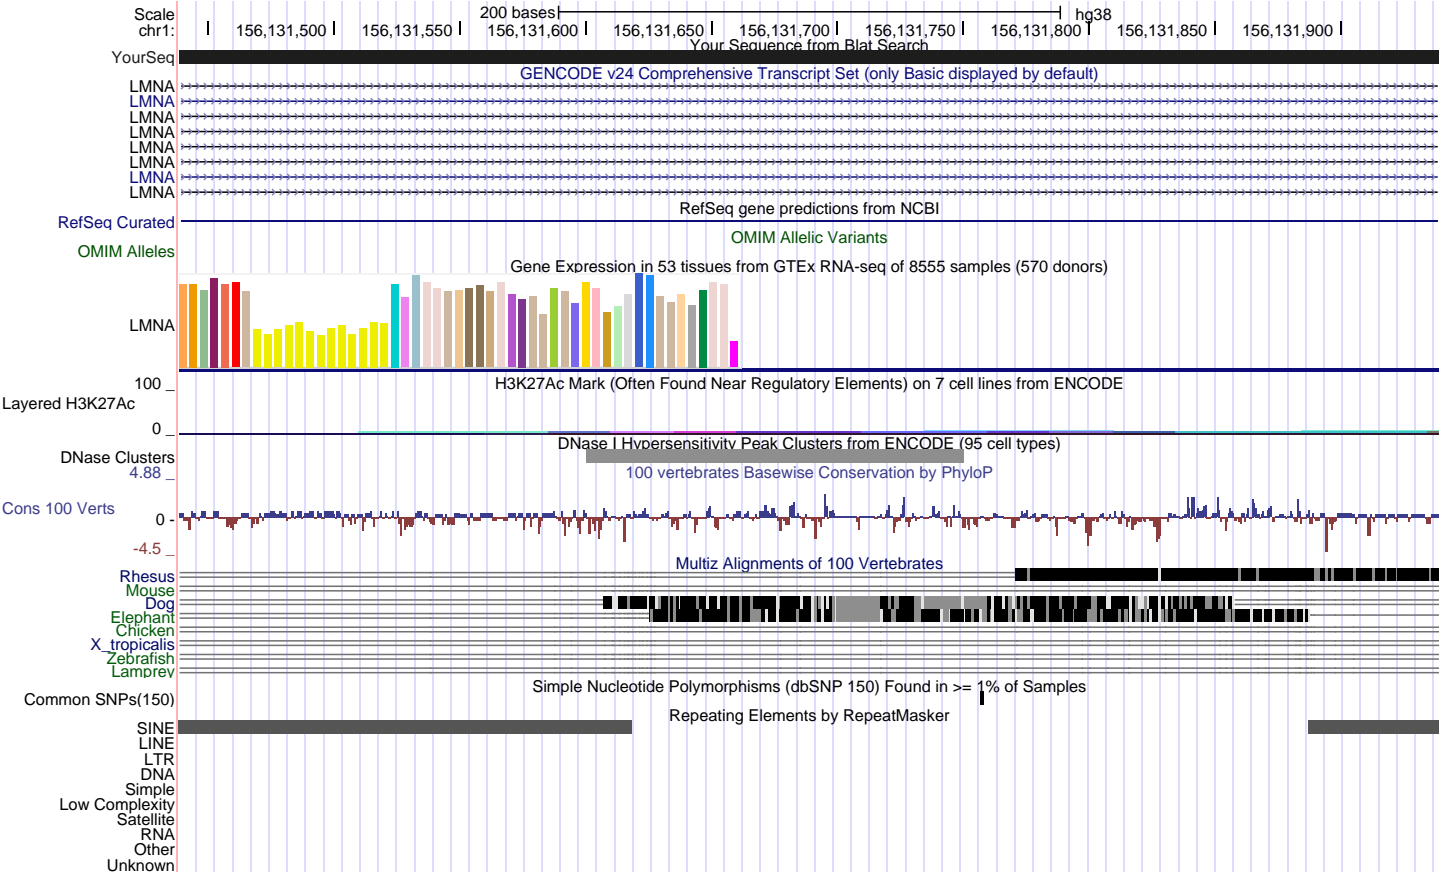

Supplement: 12885_2018_4749_MOESM3_ESM.pdf [file 12885_2018_4749_MOESM3_ESM.pdf]
